# Supplementary material for: SNPs in lncRNA KCNQ1OT1 Modulate Its Expression and Confer Susceptibility to Salt Sensitivity of Blood Pressure in a Chinese Han Population
Source: MDPI journal article supplement (doi:10.3390/nu14193990), 2022-09-26
Supplement: s1 [file s1]

**Supplementary Table S1. Demographic and clinical characteristics of participants.**

| Characteristics                                                        | First stage<br>(n=251) | Second stage<br>(n=1443) | All subjects<br>(n=1684) |
|------------------------------------------------------------------------|------------------------|--------------------------|--------------------------|
| Gender (male, %)                                                       | 76(30.3)               | 371(25.9)                | 447(26.5) *              |
| Age (years)                                                            | 63(59-67)              | 59.29(54-63.90)          | 59(54-63)                |
| BMI (kg/m <sup>-2</sup> )                                              | 25.03(23.11-27.26)     | 25.92(23.91-28.21)       | 25.92(23.85-28.20)       |
| WHR                                                                    | 0.90(0.85-0.95)        | 0.88(0.85-0.93)          | 0.89(0.85-0.93)          |
| FBG (mmol/L)                                                           | 5.51(5.01-5.21)        | 5.44(4.97-6.19)          | 5.43(4.97-6.17)          |
| TG (mmol/L)                                                            | 1.60(1.20-2.28)        | 1.63(1.10-2.53)          | 1.63(1.12-2.51)          |
| TC (mmol/L)                                                            | 5.14(4.58-5.70)        | 4.99(4.27-5.70)          | 5.01(4.32-5.70)          |
| HDL-C (mmol/L)                                                         | 1.46(1.25-1.70)        | 1.45(1.14-2.60)          | 1.41(1.12-2.40)          |
| LDL-C (mmol/L)                                                         | 2.71(2.16-3.27)        | 2.17(1.48-2.87) *        | 2.25(1.54-2.92) *        |
| Current drinking                                                       | 147(58.6)              | 702(49.0) *              | 781(46.4) *              |
| Current smoking                                                        | 105(41.8)              | 206(14.4) *              | 258(15.3) *              |
| Hypertension (%)                                                       | 138(55.0)              | 739(51.6) *              | 850(50.5) *              |
| BP change 1 (Response to acute salt loading), mm Hg, median (quartile) |                        |                          |                          |
| SBP                                                                    | 11.18(2.68-17.68)      | 9.18(1.18-16.55)         | 9.43(1.68-16.68)         |
| DBP                                                                    | -3.10(-6.60-2.00)      | -3.60(-7.60-0.40)        | -3.60(-7.6-0.90)         |
| MAP                                                                    | 1.33(-3.17-6.49)       | 0.83(-3.84-5.16)         | 0.83(-3.84-5.16)         |
| BP change 2 (Response to diuresis shrinkage), mm Hg, median (quartile) |                        |                          |                          |
| SBP                                                                    | -3.50(-12.00-3.50)     | -3.50(-10.00-3.00)       | -3.5(-10.50-3.00)        |
| DBP                                                                    | 2.50(-2.00-6.50)       | 2.50(-1.50-6.50)         | 2.50(-1.50-6.50)         |
| MAP                                                                    | 0.00(-4.33-5.00)       | 0.50(-3.67-4.83)         | 0.33(-3.83-4.83)         |

BMI, body mass index; WHR, waist-hip ratio; FBG, fasting blood-glucose; TG, triglyceride; TC, total cholesterol; HDL-C, high density lipoprotein cholesterol; LDL-C, low density lipoprotein cholesterol; SS, salt sensitivity; SBP, systolic blood pressure; DBP, diastolic blood pressure; MAP, mean arterial pressure.

\*, P<0.05 for the association with SSBP using correlation method.

Supplementary Table S2. Function annotations of 13 SNPs in 3 SSBP-related lncRNAs.

| Gene          | SNP        | Chr:<br>position | EA/n<br>on-<br>EA | GTE<br>X<br>eQTL | CH<br>B<br>MA<br>F | MA<br>F | Regul<br>omeDB<br>Score | HaploReg                     |                              |            | 3DSNP             |        |          |          |          |
|---------------|------------|------------------|-------------------|------------------|--------------------|---------|-------------------------|------------------------------|------------------------------|------------|-------------------|--------|----------|----------|----------|
|               |            |                  |                   |                  |                    |         |                         | Promoter<br>histone<br>marks | Enhancer<br>histone<br>marks | DNAse      | Motifs<br>changed | Score  | Enhancer | Promoter | TF<br>BS |
| KCNQOT1       | rs10832417 | 11:2631427       | T/G               | -                | 0.31               | 0.30    | 3a                      |                              |                              |            | 18 altered motifs | 3.82   | 0        | 0        | 1        |
|               | rs7925578  | 11:2708717       | G/T               | -                | 0.25               | 0.29    | 3a                      | FAT, GI, MUS                 | 14 tissues                   | 8 tissues  | 16 altered motifs | 15.14  | 25       | 7        | 1        |
|               | rs3782064  | 11:2699927       | A/G               | -                | 0.12               | 0.19    | 3a                      | 23 tissues                   |                              | 43 tissues | NRSF              | 200.93 | 0        | 108      | 107      |
|               | rs11023840 | 11:2700338       | T/C               | 1 tissue         | 0.21               | 0.15    | 4                       |                              |                              |            |                   | 173.87 | 0        | 113      | 65       |
|               | rs7103496  | 11:2708707       | T/C               | 2 tissue         | 0.16               | 0.18    | 4                       | FAT, GI, MUS                 | 14 tissues                   | 7 tissues  | Foxq1,Gcm1,ATA    | 14.45  | 25       | 7        | 1        |
|               | rs58956504 | 11:2676224       | C/T               | -                | 0.07               | 0.08    | 3a                      | 23 tissues                   |                              | 39 tissues |                   | 15.66  | 31       | 0        | 0        |
|               | rs12360708 | 11:2699697       | T/C               | -                | 0.08               | 0.08    | 1b                      | 23 tissues                   |                              | 5 tissues  | HES1,Hic1,Rad21   | 144.52 | 0        | 104      | 45       |
|               | rs11023582 | 11:2639138       | A/G               | 1 tissue         | 0.05               | 0.05    | 5                       |                              |                              |            | AIRE,FXR          | 4.26   | 13       | 0        | 0        |
|               | rs231354   | 11:2685121       | T/C               | 1 tissue         | 0.13               | 0.13    | 4                       |                              | 8 tissues                    |            | Glis2             | 2.92   | 10       | 0        | 0        |
|               | rs12577654 | 11:2662099       | T/C               | -                | 0.39               | 0.38    | 4                       |                              | MUS                          | SKIN, LIV  | Hmx,SP1           | 1.51   | 1        | 0        | 1        |
| KCNQ1         | rs2411884  | 11:2714304       | C/G               | 1 tissue         | 0.25               | 0.20    | 5                       |                              | 7 tissues                    | IPSC       | 10 altered motifs | 2.88   | 9        | 0        | 0        |
| lnc-AGAP1-8:1 | rs71402704 | 2:236562716      | G/A               | -                | 0.05               | 0.03    | 2b                      |                              | BLD, GI                      |            | 4 altered motifs  | 90.49  | 4        | 0        | 71       |
| lnc-IGSF3-1:1 | rs995060   | 1:116795104      | G/C               | -                | 0.26               | 0.23    | 3b                      |                              |                              |            | CEBPB,Sox,p300    | 2.73   | 0        | 0        | 0        |

SNP, single nucleotide polymorphism. Chr, chromosome. non-EA, non-effect allele. CHB, north Han Chinese. MAF minor allele frequency, HWE Hardy-Weinberg equilibrium.

**Supplementary Table S3. The association of SSBP-related lncRNA SNP with its expression by eQTL analyses.**

| Gene    | SNPs       | Genotype | n=251 | ln expression<br>(Mean±SD) | P         | P <sup>a</sup> |
|---------|------------|----------|-------|----------------------------|-----------|----------------|
| KCNQOT1 | rs10832417 | TT       | 20    | -2.030±0.428               | 0.020*    | 0.022*         |
|         |            | TG       | 96    | -1.974±0.437               |           |                |
|         |            | GG       | 135   | -1.860±0.410               |           |                |
| KCNQOT1 | rs7925578  | GG       | 17    | -2.069±0.437               | 0.028*    | 0.021*         |
|         |            | GT       | 91    | -1.956±0.434               |           |                |
|         |            | TT       | 134   | -1.871±0.413               |           |                |
| KCNQOT1 | rs3782064  | AA       | 10    | -2.046±0.452               | 0.019*    | 0.008*         |
|         |            | AG       | 71    | -2.003±0.382               |           |                |
|         |            | GG       | 163   | -1.873±0.436               |           |                |
| KCNQOT1 | rs11023840 | TT       | 7     | -2.068±0.495               | 0.045*    | 0.028*         |
|         |            | TC       | 63    | -1.983±0.381               |           |                |
|         |            | CC       | 178   | -1.889±0.435               |           |                |
| KCNQOT1 | rs7103496  | TT       | 9     | -2.004±0.356               | 0.011*    | 0.009*         |
|         |            | TC       | 73    | -2.017±0.381               |           |                |
|         |            | CC       | 163   | -1.868±0.436               |           |                |
| KCNQOT1 | rs58956504 | CC       | 5     | -1.955±0.304               | 1.99e-05* | 2.70e-06*      |
|         |            | CT       | 50    | -2.023±0.413               |           |                |
|         |            | TT       | 193   | -1.889±0.428               |           |                |
| KCNQOT1 | rs12360708 | TT       | 2     | -2.072±0.851               | 0.833     | 0.911          |
|         |            | TC       | 23    | -1.872±0.405               |           |                |
|         |            | CC       | 215   | -1.921±0.426               |           |                |
| KCNQOT1 | rs11023582 | AA       | 0     | -                          | 1.69e-07* | 1.50e-07*      |
|         |            | AG       | 20    | -2.383±0.413               |           |                |
|         |            | GG       | 231   | -1.87±0.402                |           |                |
| KCNQOT1 | rs231354   | TT       | 5     | -1.955±0.304               | 0.056     | 0.064          |
|         |            | TC       | 52    | -2.024±0.412               |           |                |
|         |            | CC       | 215   | -1.884±0.425               |           |                |
| KCNQOT1 | rs12577654 | TT       | 28    | -2.122±0.441               | 4.54e-04* | 4.09-04*       |
|         |            | TC       | 93    | -1.965±0.415               |           |                |
|         |            | CC       | 130   | -1.839±0.412               |           |                |

|               |            |    |     |              |           |           |
|---------------|------------|----|-----|--------------|-----------|-----------|
| KCNQ1         | rs2411884  | CC | 9   | -2.265±0.270 | 4.08e-06* | 1.71e-06* |
|               |            | CG | 65  | -2.068±0.465 |           |           |
|               |            | GG | 162 | -1.833±0.391 |           |           |
| lnc-AGAP1-8:1 | rs71402704 | GG | 0   | -            | 0.299     | 0.331     |
|               |            | GA | 18  | -3.195±0.856 |           |           |
|               |            | AA | 233 | -2.998±0.766 |           |           |
| lnc-IGSF3-1:1 | rs995060   | GG | 7   | -2.459±1.151 | 0.215     | 0.176     |
|               |            | GC | 94  | -1.964±0.677 |           |           |
|               |            | CC | 150 | -2.091±0.615 |           |           |

\*, P<0.05; <sup>a</sup>, adjusted for age and gender.

**Supplementary Table S4. Genotype and allele frequencies of lncRNAs SNPs and genotype risks for SSBP.**

| Gene    | SNP        | Model        | Genotype         | n=251     | P-value <sup>a</sup> |                |
|---------|------------|--------------|------------------|-----------|----------------------|----------------|
|         |            |              |                  |           | MAP<br>change1       | MAP<br>change2 |
| KCNQOT1 | rs10832417 | Log-Additive | TT vs. TG vs. GG | 20/96/135 | 0.225                | 0.681          |
| KCNQOT1 | rs7925578  | Log-Additive | GG vs. GT vs. TT | 19/92/141 | 0.481                | 0.220          |
| KCNQOT1 | rs3782064  | Log-Additive | AA vs. AG vs. GG | 10/73/168 | 0.212                | 0.717          |
| KCNQOT1 | rs11023840 | Log-Additive | CC vs. CT vs. TT | 7/63/181  | 0.157                | 0.483          |
| KCNQOT1 | rs7103496  | Log-Additive | TT vs. TC vs. CC | 9/75/167  | 0.167                | 0.983          |
| KCNQOT1 | rs58956504 | Log-Additive | CC vs. CT vs. TT | 3/43/205  | 0.159                | 0.012*         |
| KCNQOT1 | rs11023582 | Log-Additive | AA vs. AG vs. GG | 0/20/231  | 0.087                | 0.210          |
| KCNQOT1 | rs2411884  | Log-Additive | CC vs. CG vs. GG | 10/69/172 | 0.124                | 0.605          |
| KCNQOT1 | rs12577654 | Log-Additive | TT vs. TC vs. CC | 28/93/130 | 0.194                | 0.846          |

<sup>a</sup>, P<0.05; P value was calculated by adjusted age, gender, FBG, LDL, smoking, and drinking.
